# Supplementary material
Source: PubMed Central journal article supplement (PMC3680587)
Supplement: supp_120567_cardio-fritz-1-at.pdf [file supp_120567_cardio-fritz-1-at.pdf]

**Appendix 1 (as supplied by authors): Menu of Interventions**

| <b>Intervention</b>                  | <b>Optimal Dose</b>    | <b>Intervention</b>                   | <b>Optimal Dose</b>        |
|--------------------------------------|------------------------|---------------------------------------|----------------------------|
| <b>Dietary Interventions</b>         |                        | <b>Supplement-based Interventions</b> |                            |
| Portfolio Diet and/or Dash Diet      | n/a                    | Fish oil                              | 2000 mg EPA/DHA            |
| ↓ saturated & trans fat, cholesterol | n/a                    | Plant sterols                         | 500 mg 3x daily with meals |
| Raw almonds and/or walnuts           | ¼ to ½ cup (14-28)     | Cinnamon                              | 1000 mg/d or ½ tsp         |
| Raw extra virgin olive oil           | 2 tbsp/d               | CoQ10                                 | 100 mg/d                   |
| Fruit and vegetable intake           | 4 serv. ea/d           | ALA                                   | 300-600 mg/d               |
| Oatmeal/ oatbran                     | ½ cup/d                | Lutein                                | 10 mg/d                    |
| Soy protein                          | 50 g/d                 | Fibre                                 | 1 sach/ 8 oz. fl. 1-2 x/d  |
| Coffee – reduce or eliminate         | n/a                    | <b>Lifestyle Interventions</b>        |                            |
| Pomegranate juice                    | 250 ml (1 cup) per day | Weight loss of 5-10 lbs               | 1-2 lbs/wk                 |
| Fatty fish consumption               | 2-3 serv/wk            | Exercise: aerobic; anaerobic          | 30 min/d 5x/wk; 2-3 x/wk   |
|                                      |                        | Diaphragmatic breathing               | 10 min/d                   |
