# Supplementary material
Source: PubMed Central journal article supplement (PMC3680587)
Supplement: supp_120567_cardio-fritz-2-at.pdf [file supp_120567_cardio-fritz-2-at.pdf]

**Appendix 2 (as supplied by authors): Secondary outcomes after one-year treatment**

| Outcomes                 | Visit | NC+EUC<br>Mean or %<br>(SE) | EUC<br>Mean or %<br>(SE) | Estimated difference<br>(95%CI), p-value |
|--------------------------|-------|-----------------------------|--------------------------|------------------------------------------|
| BMI (kg/m <sup>2</sup> ) | 26wk  | 28.94<br>(0.3)              | 28.62<br>(0.31)          | -0.32 (-1.17, 0.54),<br>0.47             |
|                          | 52wk  | 28.03<br>(0.52)             | 28.3<br>(0.53)           | 0.27 (-1.21, 1.74), 0.72                 |
| Group p-value =0.96      |       |                             |                          |                                          |
| Hip circumference (cm)   | 26wk  | 106.6<br>(0.28)             | 107.41<br>(0.29)         | 0.81 (0.01, 1.61), 0.048                 |
|                          | 52wk  | 105.76<br>(0.45)            | 106.44<br>(0.46)         | 0.68 (-0.6, 1.96), 0.29                  |
| Group p-value =0.10      |       |                             |                          |                                          |
| Waist to hip ratio       | 26wk  | 0.93 (0)                    | 0.93 (0)                 | 0 (-0.01, 0.01), 0.72                    |
|                          | 52wk  | 0.92<br>(0.02)              | 0.98<br>(0.03)           | 0.06 (0, 0.13), 0.07                     |
| Group p-value =0.06      |       |                             |                          |                                          |
| Waist circumference (cm) | 26wk  | 99.06<br>(0.37)             | 100.06<br>(0.38)         | 1 (-0.05, 2.04), 0.06                    |
|                          | 52wk  | 98.25<br>(0.52)             | 100.36<br>(0.53)         | 2.1 (0.63, 3.58), 0.01                   |
| Group p-value =0.01      |       |                             |                          |                                          |
| Alcohol: drinks/wk       | 26wk  | 2.56<br>(0.29)              | 2.86 (0.3)               | 0.3 (-0.52, 1.12), 0.47                  |
|                          | 52wk  | 2.66<br>(0.33)              | 2.84<br>(0.34)           | 0.18 (-0.76, 1.11), 0.71                 |
| Group p-value =0.54      |       |                             |                          |                                          |
| Smoke: pks/wk            | 26wk  | 2.44<br>(0.45)              | 1.97<br>(0.37)           | -0.47 (-1.63, 0.69),<br>0.42             |
|                          | 52wk  | 1.68<br>(0.18)              | 1.89<br>(0.19)           | 0.21 (-0.3, 0.73), 0.42                  |
| Group p-value=0.71       |       |                             |                          |                                          |
| Caffeine: cups/wk        | 26wk  | 12.42<br>(0.63)             | 13.37<br>(0.64)          | 0.95 (-0.83, 2.73), 0.29                 |
|                          | 52wk  | 8.84<br>(0.84)              | 12.79<br>(0.86)          | 3.94 (1.57, 6.32), 0.001                 |
| Group p-value =0.01      |       |                             |                          |                                          |
| Exercise (mins/wk): low  | 26wk  | 84.47<br>(17.75)            | 51.65<br>(18.22)         | -32.82 (-82.97, 17.33),<br>0.20          |
|                          | 52wk  | 227.37<br>(47.84)           | 185.83<br>(50.72)        | -41.54 (-179.04, 95.95),<br>0.55         |
| Group p-value=0.30       |       |                             |                          |                                          |

Appendix to: Seely D, Szczurko O, Cooley K, et al. Naturopathic medicine for the prevention of cardiovascular disease: a randomized clinical trial. *CMAJ* 2013.

DOI:10.1503/cmaj.120567. Copyright © 2013 Canadian Medical Association or its licensors.

| Outcomes                             | Visit | NC+EUC<br>Mean or %<br>(SE) | EUC<br>Mean or %<br>(SE) | Estimated difference<br>(95%CI), p-value |
|--------------------------------------|-------|-----------------------------|--------------------------|------------------------------------------|
| Exercise (mins/wk): med              | 26wk  | 34.74<br>(6.44)             | 22.7<br>(6.63)           | -12.04 (-30.37, 6.29),<br>0.20           |
|                                      | 52wk  | 25.66<br>(6.69)             | 25.18<br>(6.82)          | -0.48 (-19.42, 18.45),<br>0.96           |
| Group p-value =0.43                  |       |                             |                          |                                          |
| Exercise (mins/wk): high             | 26wk  | 12.86<br>(2.19)             | 6.92<br>(2.26)           | -5.94 (-12.15, 0.27),<br>0.06            |
|                                      | 52wk  | 17.5<br>(4.45)              | 7.49<br>(4.63)           | -10.01 (-22.68, 2.66),<br>0.12           |
| Group p-value =0.04                  |       |                             |                          |                                          |
| MYMOP score:<br>symptom 1            | 26wk  | 2.87<br>(0.15)              | 3.15<br>(0.15)           | 0.28 (-0.14, 0.71), 0.19                 |
|                                      | 52wk  | 2.25<br>(0.22)              | 3.24<br>(0.21)           | 0.99 (0.38, 1.6), 0.001                  |
| Group p-value =0.002                 |       |                             |                          |                                          |
| MYMOP score:<br>symptom 2            | 26wk  | 2.93<br>(0.21)              | 3.78<br>(0.21)           | 0.84 (0.26, 1.43), 0.01                  |
|                                      | 52wk  | 1.67<br>(0.24)              | 3.68<br>(0.22)           | 2.01 (1.36, 2.67), <<br>0.0001           |
| Group p-value < 0.0001               |       |                             |                          |                                          |
| MYMOP score:<br>activity             | 26wk  | 2.52 (0.2)                  | 3.29<br>(0.24)           | 0.78 (0.16, 1.39), 0.01                  |
|                                      | 52wk  | 1.91<br>(0.25)              | 2.98<br>(0.28)           | 1.07 (0.33, 1.81), 0.01                  |
| Group p-value =0.001                 |       |                             |                          |                                          |
| MYMOP score:<br>general<br>wellbeing | 26wk  | 2.11<br>(0.13)              | 2.46<br>(0.13)           | 0.35 (-0.01, 0.71), 0.06                 |
|                                      | 52wk  | 1.58<br>(0.14)              | 2.91<br>(0.14)           | 1.33 (0.93, 1.73), <<br>0.0001           |
| Group p-value < 0.0001               |       |                             |                          |                                          |
| MYMOP score:<br>Meds Y/N             | 26wk  | 0.12<br>(0.04)              | 0.19<br>(0.04)           | 0.07 (-0.03, 0.17), 0.16                 |
|                                      | 52wk  | 0 (0.03)                    | 0.15<br>(0.03)           | 0.15 (0.07, 0.23),<br>0.0004             |
| Group p-value=0.001                  |       |                             |                          |                                          |
| SF36: General<br>Health              | 26wk  | 55.32<br>(0.74)             | 55.95<br>(0.75)          | 0.62 (-1.46, 2.71), 0.56                 |
|                                      | 52wk  | 54.76<br>(0.94)             | 53.36<br>(0.92)          | -1.4 (-4, 1.2), 0.30                     |
| Group p-value =0.67                  |       |                             |                          |                                          |
| SF36: Physical<br>function           | 26wk  | 79.27<br>(1.91)             | 77.25<br>(1.93)          | -2.02 (-7.37, 3.34),<br>0.46             |

| Outcomes                  | Visit | NC+EUC<br>Mean or %<br>(SE) | EUC<br>Mean or %<br>(SE) | Estimated difference<br>(95%CI), p-value |
|---------------------------|-------|-----------------------------|--------------------------|------------------------------------------|
|                           | 52wk  | 79.26<br>(2.35)             | 79.03<br>(2.28)          | -0.23 (-6.68, 6.22),<br>0.94             |
| Group p-value =0.66       |       |                             |                          |                                          |
| SF36: Role<br>physical    | 26wk  | 79.07<br>(2.04)             | 77.86<br>(2.05)          | -1.21 (-6.94, 4.51),<br>0.68             |
|                           | 52wk  | 81.15<br>(2.41)             | 75.22<br>(2.34)          | -5.93 (-12.57, 0.72),<br>0.08            |
| Group p-value =0.19       |       |                             |                          |                                          |
| SF36: Role<br>emotional   | 26wk  | 81.79<br>(2.08)             | 83.72<br>(2.1)           | 1.93 (-3.9, 7.76), 0.51                  |
|                           | 52wk  | 83.81<br>(2.58)             | 82.61<br>(2.52)          | -1.21 (-8.32, 5.9), 0.74                 |
| Group p-value =0.89       |       |                             |                          |                                          |
| SF36: Social<br>function  | 26wk  | 77.86<br>(2.17)             | 76.83<br>(2.19)          | -1.03 (-7.11, 5.05),<br>0.74             |
|                           | 52wk  | 80.52<br>(2.41)             | 77.86<br>(2.35)          | -2.66 (-9.31, 3.99),<br>0.43             |
| Group p-value =0.50       |       |                             |                          |                                          |
| SF36: Bodily<br>pain      | 26wk  | 62.75<br>(1.79)             | 61.14<br>(1.8)           | -1.61 (-6.62, 3.39),<br>0.53             |
|                           | 52wk  | 62.52<br>(2.32)             | 61.51<br>(2.22)          | -1.01 (-7.34, 5.32),<br>0.75             |
| Group p-value =0.58       |       |                             |                          |                                          |
| SF36: Vitality            | 26wk  | 57.96<br>(1.58)             | 58.07<br>(1.61)          | 0.11 (-4.33, 4.56), 0.96                 |
|                           | 52wk  | 57.17<br>(1.82)             | 56.91<br>(1.8)           | -0.26 (-5.31, 4.78),<br>0.92             |
| Group p-value =0.97       |       |                             |                          |                                          |
| SF36: Mental<br>health    | 26wk  | 70.94<br>(1.53)             | 73.66<br>(1.57)          | 2.71 (-1.61, 7.04), 0.22                 |
|                           | 52wk  | 72.52<br>(1.78)             | 73.66<br>(1.76)          | 1.14 (-3.8, 6.09), 0.65                  |
| Group p-value =0.33       |       |                             |                          |                                          |
| SF36: Aggregate<br>physic | 26wk  | 46.92<br>(0.66)             | 45.66<br>(0.67)          | -1.26 (-3.11, 0.6), 0.18                 |
|                           | 52wk  | 46.98<br>(0.76)             | 45.49<br>(0.75)          | -1.49 (-3.6, 0.62), 0.17                 |
| Group p-value =0.11       |       |                             |                          |                                          |
| SF36: Aggregate<br>mental | 26wk  | 48.1<br>(0.85)              | 49.32<br>(0.88)          | 1.21 (-1.2, 3.62), 0.32                  |
|                           | 52wk  | 48.86<br>(1.11)             | 48.47<br>(1.09)          | -0.4 (-3.46, 2.67), 0.80                 |
| Group p-value =0.72       |       |                             |                          |                                          |

Appendix to: Seely D, Szczurko O, Cooley K, et al. Naturopathic medicine for the prevention of cardiovascular disease: a randomized clinical trial. *CMAJ* 2013.

DOI:10.1503/cmaj.120567. Copyright © 2013 Canadian Medical Association or its licensors.
